# Supplementary material for: Lactate potentiates angiogenesis and neurogenesis in experimental intracerebral hemorrhage
Source: PubMed Central journal article supplement (PMC6035243; doi:10.1038/s12276-018-0113-2), 2018-07-06
Supplement: 12276_2018_113_MOESM1_ESM.pdf [file 12276_2018_113_MOESM1_ESM.pdf]

## Supplementary materials

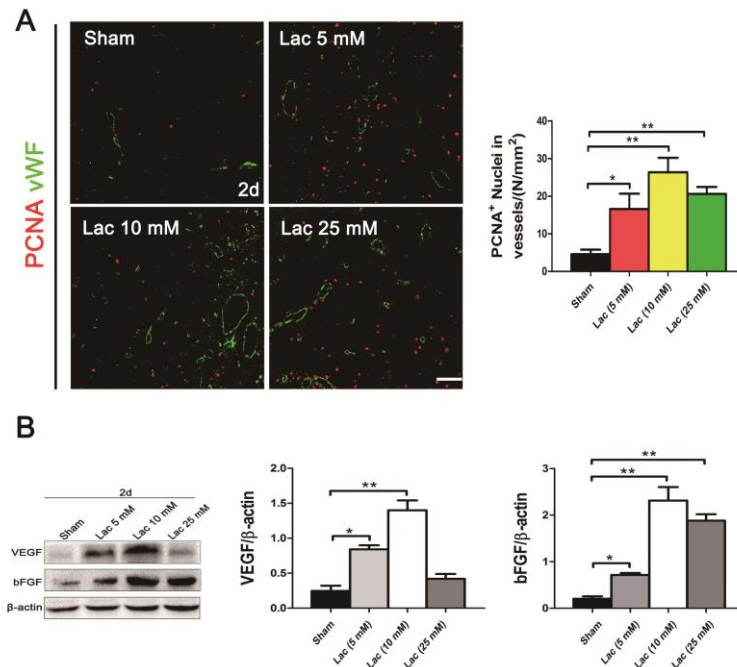

**Supplementary Figure S1.** (A) The numbers of PCNA<sup>+</sup> nuclei in vWF<sup>+</sup> dilated vessels were rarely observed in either hemisphere of the Sham controls on the day 2. Notably, PCNA<sup>+</sup> nuclei in vWF<sup>+</sup> dilated vessels appeared to be present around the L-lactate (5, 10 and 25 mM) - affected regions. (B) The expressions of VEGF were strikingly increased after 5 and 10 mM L-lactate infusion. The expressions of bFGF were strikingly increased after L-lactate infusion (5, 10 and 25 mM). The beneficial effects of 10 mM were more preminent. Lac: L-lactate. (n=5, \* $p < 0.05$  and \*\* $p < 0.01$ ).

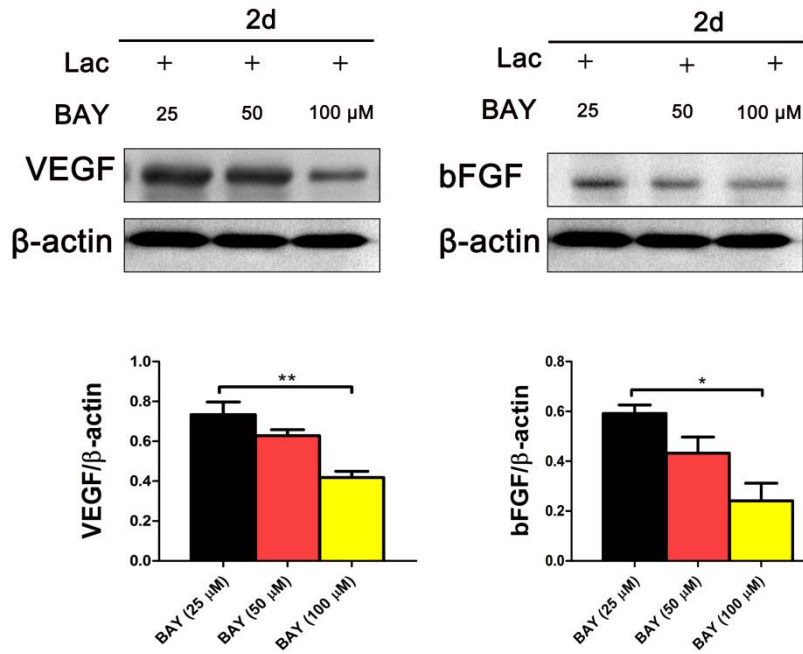

**Supplementary Figure S2.** Western blot showed that BAY inhibited the expressions of VEGF and bFGF in L-lactate group. The effects of 100  $\mu$ M BAY were most obvious. Lac: L-lactate; BAY: BAY11-7082. (n=5, \* $p$  <0.05 and \*\* $p$  <0.01).
